# Supplementary material for: Age- and Sex-Dependent Patterns of Gut Microbial Diversity in Human Adults
Source: PubMed Central journal article supplement (PMC6517691; doi:10.1128/msystems.00261-19), 2019-05-14

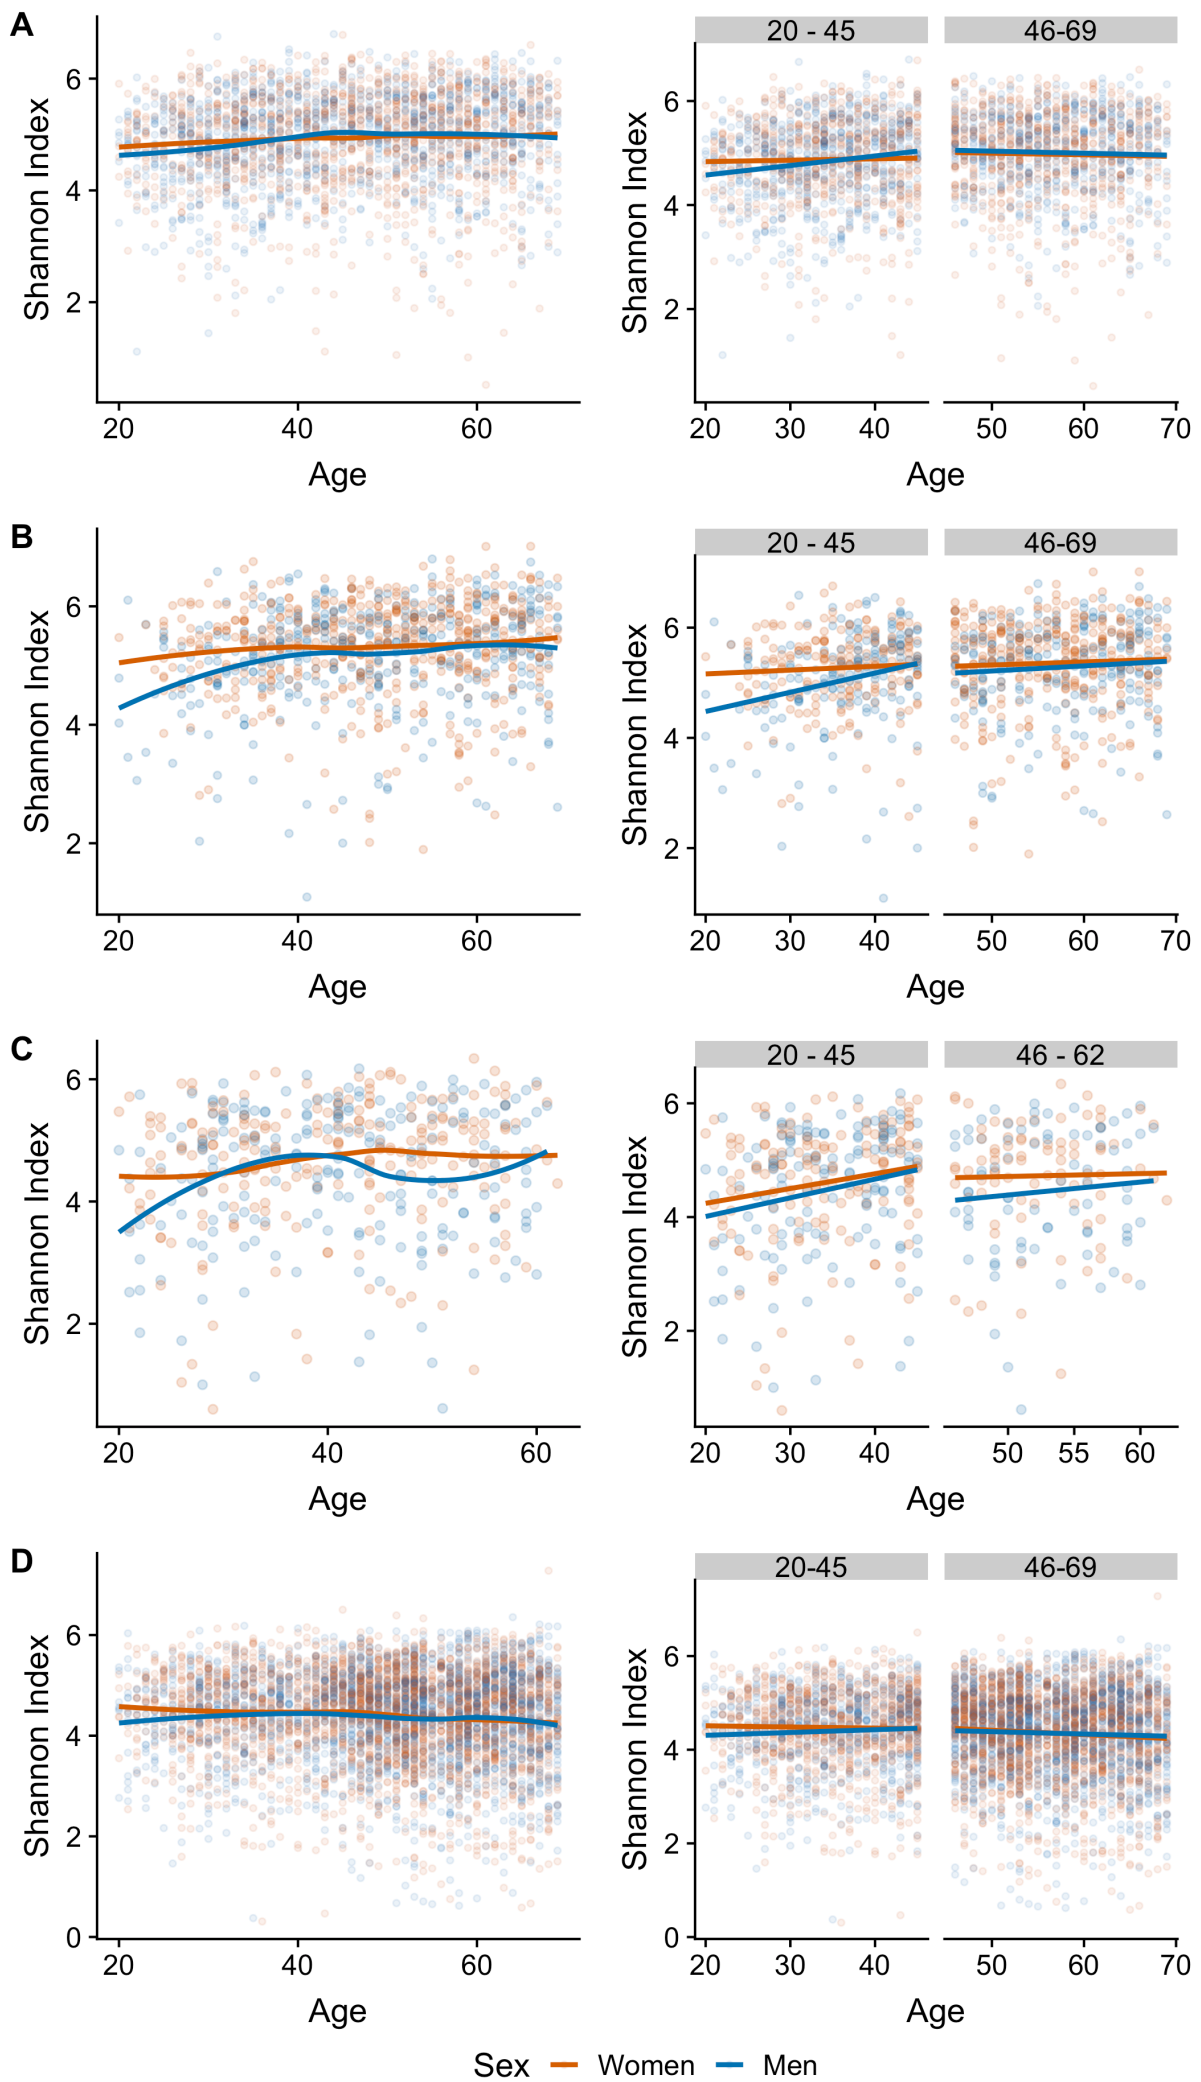

Supplement: mSystems.00261-19-sf002.pdf [file mSystems.00261-19-sf002.pdf]
